# Supplementary material for: High potency EDC-crosslinked bovine serum albumin nanoencapsulation of berberine enhances in vitro anticancer efficacy against glioblastoma by inducing ROS mediated cell apoptosis
Source: Royal Society of Chemistry journal article supplement (doi:10.1039/d2nj03880c), 2022-01-01
Supplement: d2nj03880c1.pdf [file d2nj03880c1.pdf]

Electronic Supplementary Material (ESI) for New Journal of Chemistry

**Manuscript Id:** NJ-ART-08-2022-003880.R1

**Submission title:** High Potency EDC-crosslinked Bovine Serum Albumin Nanoencapsulation of Berberine Enhances In Vitro Anticancer Efficacy Against Glioblastoma by Inducing ROS Mediated Cell Apoptosis

**Authors:** Sayantan Ghosh<sup>a</sup>, Puja Das<sup>a</sup>, and Bismita Nayak<sup>\*a</sup>

### Table S1

*In vitro* cytotoxicity analysis of BSA NPs, pure BER, and BER-BSA NPs against LN229 cell lines following 24 hrs incubation.

| BSA NPs               |                    |      | Free BER              |                    |      | BER-BSA NPs (encapsulated BER) |                    |      |
|-----------------------|--------------------|------|-----------------------|--------------------|------|--------------------------------|--------------------|------|
| Concentration (µg/mL) | Cell viability (%) | ±SEM | Concentration (µg/mL) | Cell viability (%) | ±SEM | Concentration (µg/mL)          | Cell viability (%) | ±SEM |
| 0                     | 100                | 0    | 0                     | 100                | 0    | 0                              | 100                | 0    |
| 25                    | 98.69              | 0.05 | 25                    | 53.95              | 4.40 | 0.805                          | 82.87              | 5.05 |
| 50                    | 95.97              | 0.96 | 50                    | 42.28              | 3.30 | 1.61                           | 81.81              | 5.22 |
| 75                    | 96.98              | 2.43 | 75                    | 35.43              | 4.98 | 3.22                           | 78.38              | 8.98 |
| 100                   | 93.51              | 2.58 | 100                   | 27.95              | 1.50 | 6.44                           | 68.33              | 9.57 |
| 125                   | 89.45              | 1.01 | 125                   | 25.47              | 4.09 | 9.66                           | 62.42              | 9.22 |
| 150                   | 90.96              | 2.98 | 150                   | 25.50              | 4.22 | 12.88                          | 54.09              | 7.69 |
|                       |                    |      |                       |                    |      | 16.1                           | 34.85              | 8.11 |
